# Supplementary material for: Engaging Children and Young People in Digital Mental Health Interventions: Systematic Review of Modes of Delivery, Facilitators, and Barriers
Source: PubMed Central journal article supplement (PMC7381028; doi:10.2196/16317), 2020-06-23
Supplement: jmir_v22i6e16317_app1.pdf [file jmir_v22i6e16317_app1.pdf]

**Databases, search terms, and search results**

**PsycINFO**

27.12.18; 1565

.sh=subject heading; .mp=title, abstract, heading word, table of contents,

key concepts, original title, tests & measures; .ti=title; .ab=abstract; .md=methodology; .id=key concepts (IV, DV, population)

| Child & Adolescent Mental Health                                                                                                                                                                                                                                                                                                                                                                                                            | Digital Intervention                                                                                                                                                                                                                                                                                                                      | Engagement                                                                                                                                                                                                                                                                                      |
|---------------------------------------------------------------------------------------------------------------------------------------------------------------------------------------------------------------------------------------------------------------------------------------------------------------------------------------------------------------------------------------------------------------------------------------------|-------------------------------------------------------------------------------------------------------------------------------------------------------------------------------------------------------------------------------------------------------------------------------------------------------------------------------------------|-------------------------------------------------------------------------------------------------------------------------------------------------------------------------------------------------------------------------------------------------------------------------------------------------|
| (child* OR youth* OR young OR adolesce* OR teenage*).mp. AND (exp child psychiatry/ OR exp adolescent psychiatry/ OR exp child psychopathology/ OR exp adolescent psychopathology/ OR exp mental health/ OR exp community mental health service/ OR exp community psychiatry/ OR exp emotional adjustment/ OR exp anxiety disorder/ OR exp agoraphobia/ OR exp mental health programs/ OR exp mental health services/ OR exp primary mental | (exp computer assisted therapy/ OR exp online therapy/ OR exp internet/ OR exp computer applications/ OR exp mobile devices/ OR exp social media/ OR exp websites/ OR exp internet usage/).sh. OR (app* OR mobile* OR digital* OR technolog* OR computer* OR mhealth* OR mobile health OR ehealth OR electronic health OR social media OR | (exp involvement/ OR exp client participation/ OR exp participation/ OR exp treatment compliance/ OR exp cooperation/ OR exp resistance/ OR exp psychotherapy resistance/).sh. OR (engag* OR participat* OR involv* OR adherence OR noncompliance* OR compliance* acceptab* OR resistance*).ti. |

|                                                                                                                                                                                                                                                                                                                                                                                                                                                                                                                                                                          |                                                                    |  |
|--------------------------------------------------------------------------------------------------------------------------------------------------------------------------------------------------------------------------------------------------------------------------------------------------------------------------------------------------------------------------------------------------------------------------------------------------------------------------------------------------------------------------------------------------------------------------|--------------------------------------------------------------------|--|
| <p>health prevention/ OR exp well being/ OR exp abnormal psychology/ OR exp attention deficit disorder/ OR exp attention deficit disorder with hyperactivity/ OR exp behavior disorders/ OR exp communication disorders/ OR exp conduct disorder/ OR exp emotional adjustment/ OR exp emotional disturbances/ OR exp intellectual development disorder/ OR exp learning disorder/ OR exp psychiatric patients/ OR exp psychopathology/ OR exp suicide/ OR exp thought disturbances/ OR exp psychotherapeutic outcomes/ OR exp mental health program evaluation/).sh.</p> | <p>phone OR online OR web-based OR internet OR chatbot).ti,ab.</p> |  |
|--------------------------------------------------------------------------------------------------------------------------------------------------------------------------------------------------------------------------------------------------------------------------------------------------------------------------------------------------------------------------------------------------------------------------------------------------------------------------------------------------------------------------------------------------------------------------|--------------------------------------------------------------------|--|

**MEDLINE**

27.12.18; 858

EN

Kf=keyword heading word

| Child & Adolescent Mental Health                                                                                                                                                                                                                                                                                                                                                                                                                                                                                                                      | Digital Intervention                                                                                                                                                                                                                                                                                                                                                                                                           | Engagement                                                                                                                                                                                                                                                                                                                         |
|-------------------------------------------------------------------------------------------------------------------------------------------------------------------------------------------------------------------------------------------------------------------------------------------------------------------------------------------------------------------------------------------------------------------------------------------------------------------------------------------------------------------------------------------------------|--------------------------------------------------------------------------------------------------------------------------------------------------------------------------------------------------------------------------------------------------------------------------------------------------------------------------------------------------------------------------------------------------------------------------------|------------------------------------------------------------------------------------------------------------------------------------------------------------------------------------------------------------------------------------------------------------------------------------------------------------------------------------|
| (Child/ or Adolescent/).sh or child* OR youth* OR young OR adolesce* OR teen* or student* or girl* or boy* or pupil*) .tw AND (Mental Health/ or Depression/ or Emotions/ or Stress, Psychological/ or Mental Health Services/ or Community Mental Health Services/ or Psychotic Disorders/ or Mental Disorders/ or Community Mental Health Centers/ or Mental Health Services/).sh OR ("mental difficult*" or "mental health challenge*" or "mental health problem" or "mental challenge" or "mental well\$being" or "mental health well\$being").tw | (Therapy, Computer-Assisted/ or Internet/ or Computers/ or Diagnosis, Computer-Assisted/ or Computer Communication Networks/ or Mobile Applications/).sh OR (email* or app* or mobile* or e-mail* or digital* or technolog* or computer* or tablet* or mhealth* or mobile health or ehealth or electronic health or social media or phone or website* or online or web-based or internet or chatroom* or chatbot or laptop).tw | (exp Patient Participation/px [Psychology] or Patient Compliance/px [Psychology] or Cooperative Behavior/).sh OR (involv* or "Treatment Compliance" or COOPERATION or RESISTANCE or "PSYCHOTHERAPEUTIC RESISTANCE" or engag* or participat* or involv* or adherence or noncompliance* or compliance* cooperat* or resistance*).ti. |

**Cochrane**

27.12.18; **1109**

| Child & Adolescent Mental Health                                                                                                                                                                                                                                                                                                                                                                                                                                                                                                                                      | Digital Intervention                                                                                                                                                                                                                                                                                                                                                                                                                                                                                   | Engagement                                                                                                                                                                                                     |
|-----------------------------------------------------------------------------------------------------------------------------------------------------------------------------------------------------------------------------------------------------------------------------------------------------------------------------------------------------------------------------------------------------------------------------------------------------------------------------------------------------------------------------------------------------------------------|--------------------------------------------------------------------------------------------------------------------------------------------------------------------------------------------------------------------------------------------------------------------------------------------------------------------------------------------------------------------------------------------------------------------------------------------------------------------------------------------------------|----------------------------------------------------------------------------------------------------------------------------------------------------------------------------------------------------------------|
| <p>exp Child Psychiatry or exp Adolescent Psychiatry<br/> or exp Mental Health or exp Community Mental<br/> Health Services or exp Community Psychiatry or<br/> exp Emotional Adjustment or exp Anxiety<br/> Disorders or exp Agoraphobia or exp Mental<br/> Health Services or exp Child Welfare or exp<br/> Attention Deficit Disorder with Hyperactivity or<br/> exp Mental Disorders or exp or exp<br/> Communication Disorders or exp Conduct Disorder<br/> or exp Emotional Adjustment or exp Affective<br/> Symptoms or exp Intellectual Disability or exp</p> | <p>(app* or mobile device or mobile app or<br/> smartphone or mobile phone or digital* or<br/> technolog* or computer* or mhealth* or m-<br/> health or mobile health or ehealth or<br/> electronic health or social media or phone<br/> or online or web-based) or exp Therapy,<br/> Computer-Assisted or exp Internet or exp<br/> Software or exp Social Media or internet<br/> AND prevention or treatment* or<br/> intervention* or therap* or training or<br/> support* or help* or assistan*</p> | <p>(engag* or participat* or involv* or adherence or<br/> noncompliance* or compliance* cooperat* or<br/> resistance*) or exp Patient Participation or exp<br/> Patient Compliance or Cooperative Behavior</p> |

|                                                                                                                                                                                                                                                                                                                                                                                                                                                                                                                                                                                                                                                                                                                                                                                                                                 |  |  |
|---------------------------------------------------------------------------------------------------------------------------------------------------------------------------------------------------------------------------------------------------------------------------------------------------------------------------------------------------------------------------------------------------------------------------------------------------------------------------------------------------------------------------------------------------------------------------------------------------------------------------------------------------------------------------------------------------------------------------------------------------------------------------------------------------------------------------------|--|--|
| <p>Learning Disorders or exp Psychopathology or exp Suicide OR ““child psychiatry” or “adolescent psychiatry” or “child psychopathology” or “adolescent psychopathology” or “mental health” or “community mental health service*” or “community psychiatry” or “emotional adjustment” or “anxiety disorder*” or agoraphobia or “mental health program*” or “mental health service*” or “primary mental health prevention” or “well being” or “abnormal psychology” or “attention deficit disorder*” or “attention deficit disorder with hyperactivity” or “behavior disorder*” or “communication disorder*” or “conduct disorder” or “emotional adjustment” or “emotional disturbance*” or “intellectual development disorder*” or “learning disorder*” or “psychiatric patient*” or psychopathology or suicide or “thought</p> |  |  |
|---------------------------------------------------------------------------------------------------------------------------------------------------------------------------------------------------------------------------------------------------------------------------------------------------------------------------------------------------------------------------------------------------------------------------------------------------------------------------------------------------------------------------------------------------------------------------------------------------------------------------------------------------------------------------------------------------------------------------------------------------------------------------------------------------------------------------------|--|--|

|                                                                                                                                                                                                                                                                                                                                                                                                                                                                                                                                                                                                       |  |  |
|-------------------------------------------------------------------------------------------------------------------------------------------------------------------------------------------------------------------------------------------------------------------------------------------------------------------------------------------------------------------------------------------------------------------------------------------------------------------------------------------------------------------------------------------------------------------------------------------------------|--|--|
| <p>disturbance*” or “psychotherapeutic outcome*” or<br/>“mental health program evaluation” OR (mental<br/>difficult* or mental health challenge* or mental<br/>health difficult* or mental health problem* or<br/>mental challenge* or mental well\$being or mental<br/>health well\$being or mental illness or mental health<br/>illness or mood disorder* <b>AND</b> child* or teen* or<br/>young person* or young people or kid* or<br/>adolescen* or infan* or toddler* or young adult* or<br/>student* or girl* or boy* or pupil* or exp child or<br/>exp adolescent or explode foster child</p> |  |  |
|-------------------------------------------------------------------------------------------------------------------------------------------------------------------------------------------------------------------------------------------------------------------------------------------------------------------------------------------------------------------------------------------------------------------------------------------------------------------------------------------------------------------------------------------------------------------------------------------------------|--|--|

EMBASE

27.12.18; 998

| Child & Adolescent Mental Health                                                                                                                                                                                                                                                                                                                                                                                                                                                                                                                                                                                                                                                          | Digital Intervention                                                                                                                                                                                                                                                                                                                                                                                                                                                                                                                             | Engagement                                                                                                                                                                                                                                                                       |
|-------------------------------------------------------------------------------------------------------------------------------------------------------------------------------------------------------------------------------------------------------------------------------------------------------------------------------------------------------------------------------------------------------------------------------------------------------------------------------------------------------------------------------------------------------------------------------------------------------------------------------------------------------------------------------------------|--------------------------------------------------------------------------------------------------------------------------------------------------------------------------------------------------------------------------------------------------------------------------------------------------------------------------------------------------------------------------------------------------------------------------------------------------------------------------------------------------------------------------------------------------|----------------------------------------------------------------------------------------------------------------------------------------------------------------------------------------------------------------------------------------------------------------------------------|
| <p>(child* or teen* or "young person*" or "young people" or kid* or adolescen* or infan* or toddler* or "young adult*" or student* or girl* or boy* or pupil*).ti. OR (exp child/ or exp Adopted children/ or exp Foster Children/).sh AND exp child psychiatry/ or exp adolescent psychiatry/ or exp adolescent psychopathology/ or exp mental health/ or exp community mental health service/ or exp community psychiatry/ or exp emotional adjustment/ or exp anxiety disorder/ or exp agoraphobia/ or exp mental health programs/ or exp mental health services/ or exp primary mental health prevention/ or exp well being/ or exp abnormal psychology/ or exp attention deficit</p> | <p>exp computer assisted therapy/ or exp internet/ or exp computer applications/ or exp mobile devices/ or exp social media/ or exp websites/ or exp internet usage/ OR ("online therap*" or app* or "mobile device*" or "mobile app*" or smartphone* or "mobile phone8" or digital* or technolog* or computer* or mhealth* or mhealth or mobile health or ehealth or "electronic health" or "social media" or phone or online or web-based) adj2 (treatment* or intervention* or therap* or training or support* or help* or assistan*).ti.</p> | <p>exp client participation/ or exp participation/ or exp Treatment Compliance/ or exp cooperation/ or exp resistance/ or exp psychotherapeutic resistance/ OR (engag* or participat* or involv* or adherence or noncompliance* or compliance* cooperat* or resistance*).tw.</p> |

disorder/ or exp attention deficit disorder with  
hyperactivity/ or exp behavior disorders/ or exp  
communication disorders/ or exp conduct disorder/  
or exp emotional adjustment/ or exp emotional  
disturbances/ or exp intellectual development  
disorder/ or exp learning disorder/ or exp  
psychiatric patients/ or exp psychopathology/ or  
exp suicide/ or exp thought disturbances/ or exp  
psychotherapeutic outcomes/ or exp mental health  
program evaluation/ or ("child psychopathology" or  
"mental difficult\*" or "mental health challenge\*" or  
"mental health difficult\*" or "mental health  
problem\*" or "mental challenge\*" or "mental  
well\$being" or "mental health well\$being" or  
"mental illness" or "mental health illness" or "mood  
disorder\*").tw.
