# Supplementary material for: Engaging Children and Young People in Digital Mental Health Interventions: Systematic Review of Modes of Delivery, Facilitators, and Barriers
Source: PubMed Central journal article supplement (PMC7381028; doi:10.2196/16317), 2020-06-23
Supplement: jmir_v22i6e16317_app4.pdf [file jmir_v22i6e16317_app4.pdf]

|   | First author, year | Intervention description                                                                                                                                                                                                                                                                                                                            | Study's Aim                                                                                                                                             | Country     | Study type & Method | Participants' age (years) | Sample size | Retention | Recruitment strategy used                                                                                                                                                                                                                                                                     | MMAT Score |
|---|--------------------|-----------------------------------------------------------------------------------------------------------------------------------------------------------------------------------------------------------------------------------------------------------------------------------------------------------------------------------------------------|---------------------------------------------------------------------------------------------------------------------------------------------------------|-------------|---------------------|---------------------------|-------------|-----------|-----------------------------------------------------------------------------------------------------------------------------------------------------------------------------------------------------------------------------------------------------------------------------------------------|------------|
| 1 | Wozney, 2015       | Breathe is an internet-based CBT treatment program. The program includes online (CBT treatment modules) and Internet (e-mail support) based features as well as telephone support provided by a trained health care professional                                                                                                                    | To explore the usability of Internet-based component of the Breathe program in terms of learnability, efficiency, the frequency and                     | Canada      | Mixed-methods       | 15 - 24 years             | 9           | 88.90     | Clinicians and young people were recruited through a national contact (e-mail) list maintained by the National Infant, Child and Youth Mental Health Consortium in Canada                                                                                                                     | 2          |
| 2 | Price, 2015        | Bounce Back Now (BBN) includes 4 modules to manage PTSD, depressions, cigarette use and alcohol use; each module has screening questions for relevant symptoms (those without relevant symptoms could complete or skip a given module); modules were developed using evidence-based treatments for the respective conditions. Treatment approach is | To determine the proportion of adolescents, located in nonurban and urban areas, affected by tornados that accessed and completed a web-based treatment | USA         | RCT                 | M=14.5, SD=1.7            | 2000        | 79.35     | Specific regions were targetted using the coordinates of areas exposed to a series of tornados that occurred 4 months prior to recruitment; census block IDs were assigned to the radius around each coordainte to serve as the sampling strata. Households were recruited by phone or email. | 2          |
| 3 | March, 2009        | BRAVE for Children—ONLINE is adapted from a clinic-based, CBT anxiety treatment program (the BRAVE Program) and based on theoretical and empirical research relating to the psychosocial determinants of child anxiety.                                                                                                                             | To evaluate the efficacy of an Internet-based cognitive-behavioral therapy approach to the treatment of child anxiety disorders                         | Australia   | RCT                 | M=9.45, SD = 1.37         | 73          | 93.65     | Children were referred to the program by parents, teachers, guidance officers, and other mental health professionals in response to media releases and information packages sent to schools.                                                                                                  | 4          |
| 4 | Johnston, 2014     | Mood Mechanic Course, an internet-delivered cognitive behavioural therapy for young adults with anxiety and depression which consisted of four lessons delivered over 5 weeks.                                                                                                                                                                      | To examine the efficacy and acceptability of a new therapist-guided Internet-delivered treatment for young adults with symptoms                         | New Zealand | Quantitative        | 18–24 years               | 56          | 77.78     | Interested people applied to participate in the study through a clinical research website.                                                                                                                                                                                                    | 3          |
| 5 | Fortier, 2015      | WebTIPS: tailored, innovative, web-based preoperative preparation program for children undergoing surgery and their parents. The children's website is tailored based upon children's trait anxiety and type of surgery and includes information provision, modeling                                                                                | To conduct formative evaluation and test the preliminary efficacy of a newly developed web-based, tailored behavioral preparation program               | USA         | Mixed-methods       | 2-7 years                 | 82          | 100.00    | Researchers targetted parent-child dyads scheduled to undergo outpatient surgery and general anesthesia at Children's Hospital of Orange County or Yale-New Haven Children's Hospital between August 2011 and August 2012.                                                                    | 3          |

|   |                    |                                                                                                                                                                                                                                                                                                                                                                                                                                                                                                 |                                                                                                                                               |           |              |                                   |     |       |                                                                                                                                                                                                                                                                                                                                                                                                                                        |   |
|---|--------------------|-------------------------------------------------------------------------------------------------------------------------------------------------------------------------------------------------------------------------------------------------------------------------------------------------------------------------------------------------------------------------------------------------------------------------------------------------------------------------------------------------|-----------------------------------------------------------------------------------------------------------------------------------------------|-----------|--------------|-----------------------------------|-----|-------|----------------------------------------------------------------------------------------------------------------------------------------------------------------------------------------------------------------------------------------------------------------------------------------------------------------------------------------------------------------------------------------------------------------------------------------|---|
| 6 | Anderson, 2012     | BRAVE for Teenagers-ONLINE: Standard CBT anxiety management strategies were used, including psychoeducation, relaxation training, recognition of the physiological symptoms of anxiety, cognitive strategies of coping self-talk and cognitive restructuring, graded exposure, problem solving, and self-reinforcement. The content, length, and number of session activities in the Internet program replicate those of the clinic-based session. Information is presented through interactive | To compare the relative strength of working alliance in online versus clinic delivery of CBT for anxiety in youth                             | Australia | RCT          | 12 to 18 years (M 13.91, SD 1.56) | 73  | NK    | Referrals from guidance officers, mental health professionals, and self-referrals following media publicity.                                                                                                                                                                                                                                                                                                                           | 2 |
| 7 | Tillfors, 2011     | Internet delivered CBT for Social Anxiety Disorder.                                                                                                                                                                                                                                                                                                                                                                                                                                             | To evaluate the effectiveness of an internet-delivered CBT program for                                                                        | Sweden    | RCT          | M=16.5,SD=1.6                     | 19  | 94.74 | Regional newspaper articles, school staff, advertisements in the high schools.                                                                                                                                                                                                                                                                                                                                                         | 2 |
| 8 | Bidargaddi, 2017   | The Toolbox: a personalized app recommendation service available through the ReachOut.com website.                                                                                                                                                                                                                                                                                                                                                                                              | To assess the efficacy of a Web-based self-guided app recommendation service ("The Toolbox") in improving the well-being of young Australians | Australia | RCT          | 16-25 years (M=23)                | 387 | 49.87 | Web-based paid advertisements were placed on Facebook, Twitter, YouTube, and Google AdWords. In addition to paid advertisements, links to the study site were provided to 39 organizations and educational institutions frequently visited by young people from different backgrounds to promote via their social media channels (Facebook, Twitter). Community-based organizations such as schools, universities, sporting clubs, and | 3 |
| 9 | Silfvernagel, 2015 | ICBT (internet-based cognitive behavioral therapy) was adapted for adolescents and involves 6-9 treatment modules.                                                                                                                                                                                                                                                                                                                                                                              | To examine the effects of tailored internet-based CBT for adolescents                                                                         | Sweden    | Quantitative | M=16.8                            | 11  | 72.73 | Referral routes at clinic (self-referral, parent, doctor) OR through website, brochures and information sessions.                                                                                                                                                                                                                                                                                                                      | 3 |

|    |                 |                                                                                                                                                                                                                                                                                                                                                                                                                                   |                                                                                                                                                                                                  |             |              |                                                                      |     |       |                                                                                                                                                                                                                                                                                                                                                                                   |   |
|----|-----------------|-----------------------------------------------------------------------------------------------------------------------------------------------------------------------------------------------------------------------------------------------------------------------------------------------------------------------------------------------------------------------------------------------------------------------------------|--------------------------------------------------------------------------------------------------------------------------------------------------------------------------------------------------|-------------|--------------|----------------------------------------------------------------------|-----|-------|-----------------------------------------------------------------------------------------------------------------------------------------------------------------------------------------------------------------------------------------------------------------------------------------------------------------------------------------------------------------------------------|---|
| 10 | Schlosser, 2018 | PRIME: Personalized real-time CBT intervention for motivational enhancement, a supportive online environment where persons select and document progress on small, self-determined goals in the domains of health/wellness, social relationships, creativity, and productivity.                                                                                                                                                    | To compare the efficacy of PRIME intervention to a treatment-as-usual/waitlist control group                                                                                                     | USA         | RCT          | 16 - 36 years:<br>PRIME group:<br>M=24.32 (SD=2.6)<br>Control group: | 43  | 93.02 | Participants were recruited remotely using Craigslist, online message boards, and flyers posted in clinics and doctor's offices. Study investigators also listed the study on the UCSF School of Medicine Clinical Trials website and the lab website, and directly contacted other research labs. Interested participants                                                        | 4 |
| 11 | Moir, 2015      | CALM: Computer Assisted Learning for the Mind is a self-care website containing written information and audiofiles to promote good mental health and wellbeing. The website was divided into three sections: 'managing stress, anxiety and depression'; 'mental resilience'; and 'finding meaning in life' utilising CBT, mindfulness, positive                                                                                   | To develop an evidence-based self-help website designed to improve mental health amongst medical students. To assess the proportion, demographics and mental health of students who chose to use | New Zealand | Quantitative | M=21.1; SD=3.2                                                       | 321 | 24.92 | Weblink was sent out to the an entire cohort/class of students.                                                                                                                                                                                                                                                                                                                   | 2 |
| 12 | Saekowa, 2015   | StudentBodies-Eating Disorders: designed to reduce eating disorder symptoms, related psychopathology, and weight and shape concerns. SB-ED consists of 10 weekly sessions and includes activities such as self-monitoring logs and journal entries. It adopts CBT theory and techniques (behaviour modification, cognitive restructuring, increase awareness of thoughts/emotions, motivation and behaviour modifications, social | To examine the feasibility, acceptability, and short-term efficacy of a 10-week online intervention                                                                                              | USA         | RCT          | 18–25 years                                                          | 65  | 68.33 | Recruited through print and online advertisements, university list-serve emails, and classroom and dorm presentations. Residential education staff and student health services staff also directed students to the study. Additionally, students learned about the study through the Healthy Body Image Program, a comprehensive online eating disorders screening and prevention | 4 |
| 13 | Backman, 2018   | SCOPE (Spectrum Computerized PsychoEducation), internet-delivered, coach-guided, psychoeducational CBT intervention, is intended to serve as a first-line intervention for intellectually able older adolescents and young adults (16–25 years of age) diagnosed with ASD                                                                                                                                                         | To evaluate the new internet-delivered, psychoeducational intervention for adolescents and young adults with ASD                                                                                 | Sweden      | Quantitative | 16–25 years                                                          | 29  | 82.14 | Information about the study was disseminated at various Habilitation & Health centers, at psychiatric outpatient units, as well as at private health care providers, and interested individuals were directed to the study's websites to sign up.                                                                                                                                 | 3 |

|    |                   |                                                                                                                                                                                                                                                                                                                       |                                                                                                                                                                                                                   |           |              |                           |     |       |                                                                                                                                                                                                                                                                                                                                                                                                                          |   |
|----|-------------------|-----------------------------------------------------------------------------------------------------------------------------------------------------------------------------------------------------------------------------------------------------------------------------------------------------------------------|-------------------------------------------------------------------------------------------------------------------------------------------------------------------------------------------------------------------|-----------|--------------|---------------------------|-----|-------|--------------------------------------------------------------------------------------------------------------------------------------------------------------------------------------------------------------------------------------------------------------------------------------------------------------------------------------------------------------------------------------------------------------------------|---|
| 14 | Manicavasar, 2014 | Bite Back is an online positive psychology website for adolescents and uses a combination of interactive exercises and information across 9 positive psychology domains: gratitude, optimism, flow, meaning, hope, mindfulness, character strengths, healthy lifestyle, and positive relationships.                   | To examine the feasibility of the online delivery of a youth positive psychology program to improve the well-being and mental health outcomes of Australian youth                                                 | Australia | RCT          | M=15                      | 235 | 65.50 | Promotional information packs advertising the How Do You View the World Study were disseminated via mail and email and included a letter to the organization, principal, and/or school counselor that detailed the rationale, requirements, and participation incentives of the study, and a series of flyers promoting the study to young people. Organizations were asked to distribute the flyers or directly promote | 3 |
| 15 | Petsky, 2010      | Breathe Easier Online (BEO): Online intervention devised to enhance social problem-solving skills and improve treatment adherence.                                                                                                                                                                                    | To test the intervention to improve the sense of well-being, social problem-solving skills, treatment compliance                                                                                                  | Australia | RCT          | 10–17 years               | 42  | 47.62 | NK                                                                                                                                                                                                                                                                                                                                                                                                                       | 3 |
| 16 | Santisteban, 2017 | CA CIFTA: Computer Assisted Culturally Informed and Flexible Family-Based Treatment for Adolescents (CIFTA): 4-6 computer-based modules and 6-10 face-to-face sessions over 12                                                                                                                                        | To test the efficacy of a computer-assisted treatment for behaviour problems and family conflict                                                                                                                  | USA       | RCT          | M=13.6, SD=1.17           | 80  | 67.50 | Referrals through school counsellors and community agencies.                                                                                                                                                                                                                                                                                                                                                             | 3 |
| 17 | Landback, 2009    | CATCH-IT (Competent Adulthood Transition with Cognitive-behavioral, Humanistic and Interpersonal Training) is a primary care/Internet-based "behavioral" vaccine intended for adolescents at elevated risk for depression. The intervention consists of 14 modules based on Behavioral Activation, CBT, Interpersonal | To revisit and improve the initial version of the CATCH-IT Internet-based depression prevention intervention. To change the intervention from a content-rich Internet self-help book to an aesthetically engaging | USA       | Quantitative | 14-21 years (M= 18; SD=2) | 25  | NK    | Patients reporting depressed mood, anhedonia, irritability during their routine check-up or illness related visit at their primary care clinic were informed of the study.                                                                                                                                                                                                                                               | 4 |

|    |                    |                                                                                                                                                                                                                                                                                                                                                      |                                                                                                                                                                                             |     |               |                                 |    |       |                                                                                                                                                                                           |   |
|----|--------------------|------------------------------------------------------------------------------------------------------------------------------------------------------------------------------------------------------------------------------------------------------------------------------------------------------------------------------------------------------|---------------------------------------------------------------------------------------------------------------------------------------------------------------------------------------------|-----|---------------|---------------------------------|----|-------|-------------------------------------------------------------------------------------------------------------------------------------------------------------------------------------------|---|
| 18 | Saulsberry, 2013   | CATCH-IT (Competent Adulthood Transition with Cognitive-behavioral, Humanistic and Interpersonal Training) is a primary care/Internet-based "behavioral" vaccine intended for adolescents at elevated risk for depression. The intervention consists of 14 modules based on Behavioral                                                               | To compare two forms of primary care provider (PCP) engagement (motivational interview [MI] and brief advice [BA]) for adolescents using the primary care/Internet-based                    | USA | RCT           | M=17.26;SD=1.85                 | 84 | 70.00 | Recruited primary care sites by approaching five major healthcare organizations and then approaching physicians within those organizations.                                               | 3 |
| 19 | Gladstone, 2014    | CATCH-IT (Competent Adulthood Transition with Cognitive-behavioral, Humanistic and Interpersonal Training) is a primary care/Internet-based "behavioral" vaccine intended for adolescents at elevated risk for depression. The intervention consists of 14 modules based on Behavioral Activation, CBT, Interpersonal Psychotherapy, and a community | To examine intervention variables that predict favorable changes in depressive symptoms at 6- to 8-week follow-up in at-risk adolescents who participated in a primary care, Internet-based | USA | Quantitative  | 14 - 21 years (M=17.5, SD=2.04) | 83 | 83.13 | Adolescents with primary care visits at participating clinics were screened for risk of disorder (subthreshold depressive symptoms) and given information for participation in the study. | 2 |
| 20 | Iloabachie, 2011   | CATCH-IT (Competent Adulthood Transition with Cognitive-behavioral, Humanistic and Interpersonal Training) is a primary care/Internet-based "behavioral" vaccine intended for adolescents at elevated risk for depression. The intervention consists of 14 modules based on Behavioral Activation, CBT, Interpersonal Psychotherapy, and a community | To understand the experience of adolescents involved in the Internet-based intervention for depression (CATCH-IT), as well as the experiences of their parents while they were              | USA | Mixed-methods | 14 - 21 years                   | 83 | 85.71 | Primary care sites by approaching five major health care organizations and then approached physicians within those organizations.                                                         | 4 |
| 21 | Van Voorhees, 2009 | CATCH-IT (Competent Adulthood Transition with Cognitive-behavioral, Humanistic and Interpersonal Training) is a primary care/Internet-based "behavioral" vaccine intended for adolescents at elevated risk for depression. The intervention consists of 14 modules based on Behavioral Activation, CBT, Interpersonal                                | To determine how two different forms of primary care physician engagement, brief advice (BA) versus motivational interview (MI), could enhance participation outcomes in an Internet-       | USA | RCT           | 14-21 years                     | 83 | 92.68 | Primary care sites by approaching five major health care organizations and then approached physicians within those organizations.                                                         | 3 |

|    |                    |                                                                                                                                                                                                                                                                                                                                                                                |                                                                                                                                                                    |           |             |                                |    |       |                                                                                                                                                                                                         |   |
|----|--------------------|--------------------------------------------------------------------------------------------------------------------------------------------------------------------------------------------------------------------------------------------------------------------------------------------------------------------------------------------------------------------------------|--------------------------------------------------------------------------------------------------------------------------------------------------------------------|-----------|-------------|--------------------------------|----|-------|---------------------------------------------------------------------------------------------------------------------------------------------------------------------------------------------------------|---|
| 22 | Van Voorhees, 2009 | CATCH-IT (Competent Adulthood Transition with Cognitive-behavioral, Humanistic and Interpersonal Training) is a primary care/Internet-based "behavioral" vaccine intended for adolescents at elevated risk for depression. The intervention consists of 14 modules based on Behavioral Activation, CBT, Interpersonal Psychotherapy, and a community resiliency concept model. | To evaluate two approaches with varying time and complexity in engaging adolescents with an Internet-based preventive intervention for depression in primary care  | USA       | RCT         | 14–21 years                    | 83 | 96.42 | Primary care sites by approaching five major health care organizations and then approached physicians within those organizations.                                                                       | 5 |
| 23 | Motter, 2019       | CCT (Computerized cognitive training): The training program employed a process-based approach to CCT, in which cognitive improvement is driven by repetitive completion of the same type of task at varying degrees of difficulty and                                                                                                                                          | To test the proposed executive functioning/processing speed mechanism of action of Computerized Cognitive Training on depressive                                   | USA       | RCT         | 18–29 years (M = 21.0, SD=3.7) | 46 | 76.00 | Participants were recruited via online advertisements, flyers in the community, and electronic mailing lists of various college/university counseling centers, academic departments, and social groups. | 2 |
| 24 | Spence, 2006       | CLIN-NET is a CBT service that provided half of the sessions delivered via the Internet. For the child program, 5 of the 10 sessions plus the 3-month booster session were adapted to Internet delivery, with the remaining sessions being conducted in the                                                                                                                    | To explore the feasibility and efficacy of partially delivering CBT for the child anxiety disorders via the Internet                                               | Australia | RCT         | 7 - 14 years                   | 72 | 90.27 | Referred from mental health clinics and school counselors.                                                                                                                                              | 4 |
| 25 | Sobowale, 2013     | Grasp the Opportunity: Adaptation of CATCH-IT, an internet-based depression prevention intervention for early- and late-stage adolescents, utilized aspects of cognitive behavioral therapy (CBT), interpersonal therapy (IPT), behavioral activation (BA), and resiliency theory.                                                                                             | To develop a revised intervention of the US version of the CATCH-IT program for Chinese adolescents in order to improve resiliency in youth at risk for depression | Hong Kong | Qualitative | 15-24 years                    | 16 | NK    | Participants were recruited by e-mail and personal contact from the University of Hong Kong and the Wah Yan College and a secondary school on Hong Kong Island.                                         | 5 |
| 26 | Monshat, 2012      | MATE (Mindful Awareness Training and Evaluation): A 6-week online mindfulness training course.                                                                                                                                                                                                                                                                                 | To involve young people in designing an online Mindfulness Training                                                                                                | Australia | Qualitative | 16-26 years (M=22)             | 20 | NK    | Online advertisements                                                                                                                                                                                   | 5 |

|    |                       |                                                                                                                                                                                                                                                                                                                 |                                                                                                                                                                     |           |               |                                |      |        |                                                                                                                    |   |
|----|-----------------------|-----------------------------------------------------------------------------------------------------------------------------------------------------------------------------------------------------------------------------------------------------------------------------------------------------------------|---------------------------------------------------------------------------------------------------------------------------------------------------------------------|-----------|---------------|--------------------------------|------|--------|--------------------------------------------------------------------------------------------------------------------|---|
| 27 | Ooi, 2012             | Meeky Mouse: a modified version of the original web-based CBT programme developed at the Hospital for Sick Children, Canada resulted in a web-based cognitive-behavioural therapy programme for the treatment of selective mutism. This involves a 14-week 'Meeky Mouse' programme consisting of eight training | To examine the use of a web-based CBT programme among Singaporean children diagnosed with selective mutism                                                          | Singapore | Mixed-methods | 6-11 years (M=9; SD=2.35)      | 5    | 100.00 | Referred to the study by their attending child psychiatrist.                                                       | 3 |
| 28 | Alvarez-Jimenez, 2018 | MOMENTUM: designed to foster self-efficacy and increase positive emotions while providing mindfulness and social support through a purpose-built online social environment.                                                                                                                                     | To describe the theoretical basis and therapeutic targets of a novel intervention targeting social functioning in UHR young people and to examine its acceptability | Australia | Mixed-methods | M = 20.3; SD = 3.4             | 14   | 92.86  | Eligible participants were oriented to the system by the study coordinator a research clinic.                      | 4 |
| 29 | Neil, 2009            | MoodGym: An interactive internet intervention consisting of 5 modules, based on CBT to prevent symptoms of depression and anxiety, contains exercises, quizzes                                                                                                                                                  | To investigate adherence                                                                                                                                            | Australia | Quantitative  | 3 - 17 years                   | 8207 | 15.79  | Participants at school were asked to log in while commute sample self-referred by logging into the moodgym website | 5 |
| 30 | Lillevoll, 2014       | MoodGym: An interactive internet intervention consisting of 5 modules, based on CBT to prevent symptoms of depression and anxiety, contains exercises, quizzes                                                                                                                                                  | To evaluate the feasibility and efficacy of disseminating a self-directed internet-based mental                                                                     | Norway    | RCT           | Control group: M=16.78 MoodGYM | 707  | 71.15  | Participants were recruited through visits of the research group to the four participating schools.                | 2 |
| 31 | O'Kearney, 2009       | MoodGym: An interactive internet intervention consisting of 5 modules, based on CBT to prevent symptoms of depression and anxiety, contains exercises, quizzes                                                                                                                                                  | To test effectiveness of a cognitive behaviour therapy Internet program for                                                                                         | Australia | Quantitative  | 15-16 years                    | 157  | 71.34  | NK                                                                                                                 | 2 |
| 32 | O'Kearney, 2006       | MoodGym: An interactive internet intervention consisting of 5 modules, based on CBT to prevent symptoms of depression and anxiety, contains exercises, quizzes                                                                                                                                                  | To test effectiveness of a cognitive behaviour therapy Internet program for depressive symptoms                                                                     | Australia | Quantitative  | 15-16 years                    | 78   | 79.66  | Students were informed verbally about the study and provided with written information.                             | 4 |
| 33 | Callear, 2013         | MoodGym: An interactive internet intervention consisting of 5 modules, based on CBT to prevent symptoms of depression and anxiety, contains exercises, quizzes and workbooks                                                                                                                                    | To investigate adolescent adherence to an Internet-based depression prevention program in schools to                                                                | Australia | RCT           | 12-17 years (M=14.34; SD=0.75) | 1477 | 87.80  | NK                                                                                                                 | 3 |

|    |                |                                                                                                                                                                                                                                                                                                                                                                                                                                                               |                                                                                                                                                                                                                                                                         |           |              |                                        |     |       |                                                                                                                                                                                        |    |
|----|----------------|---------------------------------------------------------------------------------------------------------------------------------------------------------------------------------------------------------------------------------------------------------------------------------------------------------------------------------------------------------------------------------------------------------------------------------------------------------------|-------------------------------------------------------------------------------------------------------------------------------------------------------------------------------------------------------------------------------------------------------------------------|-----------|--------------|----------------------------------------|-----|-------|----------------------------------------------------------------------------------------------------------------------------------------------------------------------------------------|----|
| 34 | Gaffney, 2014  | MYLO (Manage Your Life Online): a psychotherapy program that lends itself well to automation and application to computer-based self-help. MYLO could potentially provide an intervention that is effective for any problem a client is "stuck" with. It adopts CBT based                                                                                                                                                                                      | To test the efficacy of MYLO                                                                                                                                                                                                                                            | UK        | RCT          | 18–32 years<br>(M = 21.4;<br>SD = 3.1) | 48  | 87.50 | Advertisement on the university SONA system and volunteering website, recruitment posters and word of mouth.                                                                           | 4  |
| 35 | Anderson, 2017 | OCD? Not Me! is a fully automated eight-stage online CBT treatment program for young people (12–18 years) who are experiencing symptoms of OCD. The eight stages correspond to eight treatment modules, designed to be                                                                                                                                                                                                                                        | To describe the key lessons learned in the process of developing and evaluating the first fully-automated iCBT program for young                                                                                                                                        | Australia | NA           | 12-18 years                            | NK  | NK    | NK                                                                                                                                                                                     | NA |
| 36 | Sweeney, 2019  | Online therapy programs                                                                                                                                                                                                                                                                                                                                                                                                                                       | To explore adolescents' perceptions of online therapies, including                                                                                                                                                                                                      | Australia | Quantitative | 13-18 years<br>(M=16.98;<br>SD=1.32)   | 217 | NK    | Facebook posts on youth interest groups and advertising through secondary schools                                                                                                      | 3  |
| 37 | Hetrick, 2017  | Reframe-IT comprised eight modules of CBT delivered over a 10 week intervention period. The eight modules cover each of the following topics: engagement and problem identification, emotional recognition and distress tolerance, identification of negative automatic thinking, behavioural activation—help seeking, behavioural activation—activity scheduling (including relaxation techniques), problem solving, and cognitive restructuring, and a wrap | To test the effectiveness of an internet-based CBT program (Reframe-IT) in reducing suicide-related behaviours, depression, anxiety, hopelessness and improving problem solving and cognitive and behavioural skills in school students with suicide-related behaviours | Australia | RCT          | 13 -19 years                           | 50  | 78.00 | All secondary schools in the study catchment area were invited to participate.                                                                                                         | 5  |
| 38 | Jones, 2011    | SharpTalk: operated as both a support group and an online focus group.                                                                                                                                                                                                                                                                                                                                                                                        | To explore what young people who self-harm think about online self-harm discussion forums                                                                                                                                                                               | UK        | Qualitative  | 16-25 years<br>(M = 19)                | 95  | 59.74 | Announcements on existing online forums & Professionals and final-year students in health and social care disciplines were recruited by emails and advertisements in two universities. | 2  |

|    |                      |                                                                                                                                                                                                                                                           |                                                                                                                                                                             |             |               |                                        |     |       |                                                                                                                                                                                                                                         |   |
|----|----------------------|-----------------------------------------------------------------------------------------------------------------------------------------------------------------------------------------------------------------------------------------------------------|-----------------------------------------------------------------------------------------------------------------------------------------------------------------------------|-------------|---------------|----------------------------------------|-----|-------|-----------------------------------------------------------------------------------------------------------------------------------------------------------------------------------------------------------------------------------------|---|
| 39 | Kass, 2013           | Student Bodies: 8-week CBT internet-based program focused on reducing body weight and shape concerns.                                                                                                                                                     | To investigate whether a guided discussion group improved program efficacy in reducing weight and shape concerns associated with participation in the 8-week Student Bodies | USA         | RCT           | 18-26 years                            | 151 | 73.14 | Flyers, referrals from campus health centers, e-mail advertisements, word to mouth.                                                                                                                                                     | 4 |
| 40 | Jones, 2008          | StudentBodies2 - BED : a 16-week, Internet-facilitated, semi-structured program that incorporates cognitive-behavioral principles from the self-help manual for binge eating disorder, weight loss intervention, and hunger and satiety awareness skills. | To investigate the use of an Internet-facilitated intervention for weight maintenance and binge eating in adolescents                                                       | USA         | RCT           | M= 15.1;<br>SD= 1.0                    | 105 | 88.57 | Flyers and presentations in health education and physical education classes at cooperating high schools. Additional recruitment presentations were conducted at student rallies, freshmen orientation, and parent back-to-school night. | 3 |
| 41 | Fischer, 2012        | VIA: CBT web-based relapse prevention program for anorexia nervosa.                                                                                                                                                                                       | To assess an internet-based program for relapse prevention for anorexia-nervosa                                                                                             | Germany     | RCT           | M=23.8;<br>SD=6.6<br>M=24.1;<br>SD=5.6 | 258 | 75.78 | Recruited through one of 8 hospitals in Germany providing inpatient services and psychotherapy for eating disorders                                                                                                                     | 4 |
| 42 | Horgan, 2013         | www.losetheblues.ie : The Web site provided a forum to allow participants to offer peer support and to disseminate information on depression and links to other sources of support.                                                                       | To develop and pilot test an online peer support intervention for students experiencing depressive symptoms                                                                 | Ireland     | Mixed-methods | 18-24 years<br>(M = 20.6;<br>SD= 1.8)  | 118 | NK    | Participants were recruited from a University in Ireland. An e-mail advertising the study was sent to all students on three occasions.                                                                                                  | 4 |
| 43 | Goodyear-Smith, 2016 | YouthCHAT, adaptations were made to eCHAT (electronic Case-finding and Help Assessment Tool) to develop a CBT youth programme for electronic                                                                                                              | To tailor the YouthCHAT package for use in a clinic catering for disadvantaged youth, assess its                                                                            | New Zealand | Quantitative  | < 25 years                             | 30  | NK    | YouthCHAT was implemented in a health clinic colocated at a low-decile school with a high Māori population                                                                                                                              | 5 |

|    |                        |                                                                                                                                                                                                                                                                                                                                                                                                                                                                                                             |                                                                                                                                                                                                                                                                          |           |     |                                     |     |       |                                                                                                                                                                                                                                                                                                                        |   |
|----|------------------------|-------------------------------------------------------------------------------------------------------------------------------------------------------------------------------------------------------------------------------------------------------------------------------------------------------------------------------------------------------------------------------------------------------------------------------------------------------------------------------------------------------------|--------------------------------------------------------------------------------------------------------------------------------------------------------------------------------------------------------------------------------------------------------------------------|-----------|-----|-------------------------------------|-----|-------|------------------------------------------------------------------------------------------------------------------------------------------------------------------------------------------------------------------------------------------------------------------------------------------------------------------------|---|
| 44 | Whallen, 2010          | TeachTown: a program that includes computer lessons and natural environment activities (Connection Activities) for developmental ages 2–7 years. The computer lessons offer a focused learning environment where the child works on the computer and completes lessons that incorporate the basic principles of Applied                                                                                                                                                                                     | To assess the usefulness of the program in a school setting, where CAI programs for students with special needs are in short supply                                                                                                                                      | USA       | RCT | 3 - 6 years                         | 47  | 68.18 | NK                                                                                                                                                                                                                                                                                                                     | 3 |
| 45 | de Oliveira Rosa, 2017 | ACTIVATE™: Active cognitive training – Computerized Cognitive Remediation Training (CCRT) (ACTIVATE™). CCRT comprises six different games that target neurocognitive functions, such as working memory, speed processing, sustained and divided attention, category formation and control inhibition. During the training, participants perform a wide range of cognitive tasks like                                                                                                                        | To explore the feasibility of implementing a computerized cognitive training program for ADHD, describe its main characteristics and potential efficacy in a small pilot study                                                                                           | Brazil    | RCT | 10-12-years (M= 10.83; SD= 0.75)    | 6   | 83.33 | Patients invited to participate in the trial during their regular attendance at ProDAH. At this moment, the study protocol was explained to parents and participants to assess their interest and the feasibility of maintaining regular face-to-face training sessions. When the invitation was accepted, parents and | 2 |
| 46 | Kollins, 2018          | AKL-T01 is an investigational therapeutic cognitive training digital intervention for the treatment of attention and inhibitory control deficits in                                                                                                                                                                                                                                                                                                                                                         | To present primary efficacy and safety results of the randomized Software Treatment for Actively                                                                                                                                                                         | USA       | RCT | 8-12 years (M= 9.7; SD = 1.3)       | 348 | 85.60 | NK                                                                                                                                                                                                                                                                                                                     | 2 |
| 47 | Waters, 2015           | Attention Training Treatment (metacognitive therapy) involves 12 treatment sessions with each one including nine blocks of trials: four blocks of 20 trials, four blocks of 26 trials and one block of 40 trials (total 224 trials). Each trial consisted of either a 3x3 or a 4x4 picture array containing unpleasant background images (e.g. house on fire, person in hospital) and between one and three positive targets which are either 'good' targets (e.g., happy children; cute animals) or 'calm' | To test of efficacy for a novel form of attention training towards positive stimuli for anxious children using visual-search ABMT supplemented with distinctive verbalization techniques designed to increase children's learning, memory consolidation, and engagement. | Australia | RCT | Intervention: M=9<br>Control: M=8.5 | 59  | 88.14 | Parents responded to study advertisements circulated through local schools, paediatricians, GPs, other mental health and community health agencies, and local newspapers.                                                                                                                                              | 4 |

|    |                |                                                                                                                                                                                                                                                                                         |                                                                                                                                            |             |               |                              |    |        |                                                                                                                                                                                                                               |   |
|----|----------------|-----------------------------------------------------------------------------------------------------------------------------------------------------------------------------------------------------------------------------------------------------------------------------------------|--------------------------------------------------------------------------------------------------------------------------------------------|-------------|---------------|------------------------------|----|--------|-------------------------------------------------------------------------------------------------------------------------------------------------------------------------------------------------------------------------------|---|
| 48 | Lim, 2010      | Brain-computer interface (BCI) includes training games using electroencephalogram (EEG). The BCI can quantify one's attention level as measured by EEG waves, thereby allowing users to employ their attention to play these games directly.                                            | To investigate the efficacy and feasibility of using our BCI-based training programme to treat inattentive symptoms of ADHD                | Singapore   | Quantitative  | 7-12 years                   | 20 | 80.00  | Participants who were seen at the clinic and diagnosed to have either the combined or inattentive subtype of ADHD based on the Diagnostic and Statistical Manual of Mental Disorders, Fourth Edition (DSM-IV) were recruited. | 4 |
| 49 | Crawford, 2013 | Camp Cope-A-Lot (CCAL): interactive computer-assisted treatment program derived from the Coping Cat cognitive behavioral treatment approach for anxiety in youth. Throughout the program, participants followed along and participated with Charlie, a "camper" at CCAL, to             | To investigate effectiveness, feasibility, and acceptability of a Computerized CBT program in three Community Mental Health Centres        | USA         | Quantitative  | 7- 13 years (M=10.1; SD=1.9) | 17 | 88.24  | Families were referred within each CMHC for study participation, as well as through presentations to community providers and study flyers/brochures.                                                                          | 4 |
| 50 | Holzer, 2014   | Captain's Log - Computer-assisted cognitive remediation (CACR) consists of five modules; the software consists of 35 multi-level "brain-training" exercises designed to develop and remediate attention, concentration, memory, eye-hand coordination, basic numeric concepts, problem- | To investigate the effectiveness of a computer-assisted cognitive remediation (CACR) program in adolescents with psychosis or at high risk | Switzerland | RCT           | M= 15.4                      | 32 | 87.5%  | Participants were recruited from the Day Care Unit for Adolescents (DCUA) while they were outpatients.                                                                                                                        | 5 |
| 51 | Olivet, 2018   | OnTrack: computer-based role-playing game for young people with psychosis. The Game allows players to explore an imaginary world.                                                                                                                                                       | To develop a prototype computer-based role-playing game (RPG) designed for young people who have experienced first episode of              | USA         | Mixed-methods | M= 19.6;SD = 2.4             | 20 | NK     | Clinicians at a clinic identified potential participants and provided information about the study.                                                                                                                            | 5 |
| 52 | Chapman, 2016  | Pesky gNATs <sup>1</sup> developed by O'Reilly & Coyle, 2015 is a seven level 3D computer game that provided a psychometric assessment of symptoms, supports a CBT intervention and coaches mindfulness and self-regulation                                                             | To pilot the feasibility and acceptability of using a novel cCBT intervention                                                              | UK          | Mixed-methods | 13-16 years                  | 11 | 100.00 | Families on a waiting list for CBT were contacted by site's local collaborators.                                                                                                                                              | 4 |

|    |                 |                                                                                                                                                                                                                                                                                                                                                                                      |                                                                                                                               |                                                       |              |                       |     |       |                                                                                                |   |
|----|-----------------|--------------------------------------------------------------------------------------------------------------------------------------------------------------------------------------------------------------------------------------------------------------------------------------------------------------------------------------------------------------------------------------|-------------------------------------------------------------------------------------------------------------------------------|-------------------------------------------------------|--------------|-----------------------|-----|-------|------------------------------------------------------------------------------------------------|---|
| 53 | Klingberg, 2004 | RoboMemo: a CBT based programme consisting of performing working memory tasks implemented in a computer program. The program included visuospatial tasks and as well as                                                                                                                                                                                                              | To investigate the effect of improving Working Memory (WM) by computerized, systematic practice of WM                         | Sweden                                                | RCT          | 7 - 12 years          | 53  | 83.02 | Referral sources included pediatricians, child psychiatrists, and special teachers in schools. | 3 |
| 54 | Chukoskie, 2017 | The cognitive training games are three colorful and engaging games with interesting sound effects. These games were designed with principles to train fixation, speed and accuracy of eye movements                                                                                                                                                                                  | To demonstrate the feasibility and preliminary efficacy of using gaze-contingent video games for low cost in-home training of | USA                                                   | Quantitative | 11-16 years (M= 13.9) | 8   | 75.00 | NK                                                                                             | 3 |
| 55 | Silver, 2001    | The Emotion Trainer is a multimedia computer program. On each page of the program a digital photograph of a face, a scene or an object is shown, with a short text question and either two or four response buttons                                                                                                                                                                  | To evaluate a new computer program designed to teach people with autistic spectrum disorders to better recognize and predict  | UK                                                    | RCT          | M = 14                | 24  | 90.91 | NK                                                                                             | 3 |
| 56 | Smith, 2015     | Stressbusters, CBT approaches delivered via computer through the use of secure, interactive multimedia (animation and videos). In each session, the user: securely logs on; reports on homework and current mood; introduced to the topic of the session; chooses a video to watch of a depressed teenager (young actor) implementing the treatment technique; applies the technique | To test the efficacy of a Computerised-CBT programme for depression in young people                                           | UK                                                    | RCT          | 12-16 years           | 112 | 98.21 | Young persons at a secondary school were invited to participate.                               | 4 |
| 57 | Brezinka, 2014  | Treasure Hunt is a game that corresponds to a certain step in cognitive-behavioural treatment, representing basic concepts of CBT for children. Thus, Treasure Hunt can be described as a broadband-CBT-game covering issues that are relevant in the treatment of various disorders.                                                                                                | To evaluate the applicability and appropriateness of the game                                                                 | Switzerland, Germany, Belgium, the Netherlands, Egypt | Quantitative | M = 10.35; SD 1.86    | 339 | NK    | Recruitment via email invitations.                                                             | 4 |

|    |                 |                                                                                                                                                                                                                                                                                                                                                                                           |                                                                                                                                       |             |               |                        |     |       |                                                                                                                                                                                                                                                                                                                                                |   |
|----|-----------------|-------------------------------------------------------------------------------------------------------------------------------------------------------------------------------------------------------------------------------------------------------------------------------------------------------------------------------------------------------------------------------------------|---------------------------------------------------------------------------------------------------------------------------------------|-------------|---------------|------------------------|-----|-------|------------------------------------------------------------------------------------------------------------------------------------------------------------------------------------------------------------------------------------------------------------------------------------------------------------------------------------------------|---|
| 58 | Burns, 2010     | ROC, Reach Out Central is an internet-based "serious" game designed to improve the mental health and wellbeing of young people, particularly men. ROC is not a structured treatment; rather, the objectives of the game are to teach life skills, such as communication, problem solving and optimistic thinking, in a virtual setting using real-life scenarios. Principles of behaviour | To develop Reach Out Central, a serious game that draws on the principles of cognitive behaviour theory                               | Australia   | Quantitative  | 18–25 years            | 266 | NK    | Advertorials were posted on six gaming, entertainment, social and community youth websites. Specific male youth-oriented magazines were targeted, including Zoo Weekly, Alpha, Waves, Rolling Stone, Xbox and FHM. The campaign was advertised in print and the popular press, including 1500 bus and tram interior advertisements nationally. | 2 |
| 59 | Romero, 2017    | The Transporters: consists of 15, five-minute animated episodes that each focus on an emotion or mental state. The 15 emotions addressed in The Transporters are happy, sad, angry, afraid, disgusted, surprised, excited, tired,                                                                                                                                                         | To investigate whether computer based instruction helps students improve ER ability in computer based                                 | USA         | Quantitative  | 4 -8 years             | 4   | 75.00 | The primary researcher recruited participants from three communication and social skills deficits (CSS) classrooms at a selected site.                                                                                                                                                                                                         | 2 |
| 60 | Kuosmanen, 2018 | SPARX-R is a CBT-based self-help intervention framed as a prevention program targeting feelings of anger, stress and feeling                                                                                                                                                                                                                                                              | To examine factors affecting the implementation of SPARX-R cCBT in the context                                                        | Ireland     | Mixed-methods | 15–20 years (M= 17.32) | 28  | 93.33 | In each Youthreach Center, the program coordinator selected one class of approximately eight students to                                                                                                                                                                                                                                       | 3 |
| 61 | Dovis, 2015     | Braingame Brian: a computerized, home-based executive functioning training, embedded in a game world and is named after its main character "Brian". Brian is a young inventor who, throughout the game, helps and befriends the game-worlds inhabitants by creating increasingly elaborate inventions (e.g., a delivery-rocket for the grocery-store owner).                              | To test whether improving executive functioning in children with ADHD within the context of a computer game has an effect on symptoms | Netherlands | RCT           | 8-12 years             | 89  | 93.26 | Recruited from 14 outpatient mental-healthcare centers.                                                                                                                                                                                                                                                                                        | 5 |

|    |                   |                                                                                                                                                                                                                                                                                                                                                                                                                            |                                                                                                                       |                                   |              |                              |     |        |                                                                                                                                              |   |
|----|-------------------|----------------------------------------------------------------------------------------------------------------------------------------------------------------------------------------------------------------------------------------------------------------------------------------------------------------------------------------------------------------------------------------------------------------------------|-----------------------------------------------------------------------------------------------------------------------|-----------------------------------|--------------|------------------------------|-----|--------|----------------------------------------------------------------------------------------------------------------------------------------------|---|
| 62 | Mariano, 2015     | COM: Challenging Our Minds involves cognitive tasks designed as games to improve skills across several domains including attention, executive function, memory, visual-spatial abilities, problem solving, and communication.<br>The COM system is completed online. Cognitive tasks are designed as games involving a standardized sequence of computerized cognitive exercises intended to improve skills across several | To investigate the efficacy, feasibility, and fidelity of a remote, hybrid strategy, computerized CR program in youth | USA                               | Quantitative | 12 - 15 years                | 22  | 100.00 | Recruited through parent support groups and referrals from clinicians.                                                                       | 4 |
| 63 | Bul, 2018         | Plan-It Commander: designed to improve functional outcomes in daily life with a primary focus on time management, planning/organizing and cooperation skills among children                                                                                                                                                                                                                                                | To identify which subgroups of children with Attention Deficit Hyperactivity Disorder (ADHD) benefitted               | Europe (Belgium, The Netherlands) | RCT          | M=9.90; SD = 1.26            | 143 | 89.40  | NK                                                                                                                                           | 3 |
| 64 | Merry, 2012       | SPARX: an interactive fantasy game is designed to deliver cognitive behavioural therapy for the treatment of clinically significant depression.                                                                                                                                                                                                                                                                            | To evaluate whether a new computerised cognitive behavioural therapy intervention (SPARX, Smart,                      | New Zealand                       | RCT          | 12-19 years                  | 187 | 86.00  | Young people seeking help for symptoms of depression, were recruited sequentially through youth clinics, general practices, and school based | 5 |
| 65 | Mi-seon Kim, 2014 | Social Stories (SS): computer-based ss picture symbols system combined with video modelling to teach social communicative skills.                                                                                                                                                                                                                                                                                          | To examine the use of tablet assisted Social Stories™ intervention for high school students                           | South Korea                       | Quantitative | 17 years                     | 3   | NK     | Participants were targeted for intervention according to number of criteria.                                                                 | 4 |
| 66 | Williams, 2002    | CAI: Computer assisted instruction (CAI) includes book and card games scanned into a computer including sounds that children can read similar to                                                                                                                                                                                                                                                                           | To evaluate the progress of eight children in their development of reading skills in two conditions                   | UK                                | Quantitative | 3-5 years (M = 4.6; SD 1.01) | 8   | NK     | Recruited through the local autism specialist unit within a special school.                                                                  | 3 |

|    |                  |                                                                                                                                                                                                                                                                                               |                                                                                                                                                                                                        |         |             |                                         |    |       |                                                                                                                                                                                                                                                                                                                                                                 |   |
|----|------------------|-----------------------------------------------------------------------------------------------------------------------------------------------------------------------------------------------------------------------------------------------------------------------------------------------|--------------------------------------------------------------------------------------------------------------------------------------------------------------------------------------------------------|---------|-------------|-----------------------------------------|----|-------|-----------------------------------------------------------------------------------------------------------------------------------------------------------------------------------------------------------------------------------------------------------------------------------------------------------------------------------------------------------------|---|
| 67 | Kobak, 2015      | Technology enhanced CBT intervention for the treatment of adolescent depression consisting of (1) online therapist training (2) in-session use of tablets for teaching clients CBT concepts and skills, and (3) text messaging for between session homework reminders and self-monitoring.    | To evaluate the feasibility, user satisfaction, and effectiveness of this technology enhanced approach for treating adolescent depression                                                              | USA     | RCT         | 12–17 years<br>(M = 15.4;<br>SD = 1.52) | 65 | 89.74 | Clinicians who work with depressed adolescents participated in the study. Clinicians were recruited through advertisements in professional journals and through direct mail (i.e., Psychology today listing of clinicians working with depressed adolescents). Each clinician                                                                                   | 3 |
| 68 | Fleischman, 2018 | StudyCare Stress is based on the principles of cognitive behavioral therapy and constitutes a modification of Get.On Stress, an online stress management intervention.                                                                                                                        | To explore the experiences of students participating in an Internet- and App-based stress management intervention originally                                                                           | Germany | Qualitative | 20 - 32 years<br>(M= 24; SD= 4)         | 10 | NK    | Participants were selected from an existing randomized controlled trial that evaluated the effectiveness of an Internet- and App-based stress training.                                                                                                                                                                                                         | 5 |
| 69 | Jones, 2015      | TE-HNC (Technology-Enhanced Helping the Noncompliant Child) includes the Helping the Noncompliant Child program, as well as smartphone components that were developed to enhance, rather than replace, clinic-based, therapist guided services based on the applied behaviour analysis model. | To develop and pilot test a technology-enhanced version of one evidence-based Behavioral Parent Training (BPT) program (Helping the Noncompliant Child - HNC) for Disruptive Behavior Disorders (DBDs) | USA     | RCT         | 3-8 years<br>(M= 5.670)                 | 22 | 83.36 | Low-income families in north central North Carolina (NC) were recruited via: (1) Advertisements targeting areas, work places, and retail outlets with an overrepresentation of low-income parents (48% of pilot families); (2) Healthcare, social service, and other agencies that serve low-income families (28% of pilot families); (3) Local schools (19% of | 1 |
| 70 | Kennard, 2018    | ASAP: As Safe as Possible is a brief App-supported intervention consisting of four modules. The intervention includes a telephone app (BRITE) that promotes emotion regulation and provides access to a personalized safety plan during transition from inpatient care to outpatient care.    | To report on a pilot study of an inpatient intervention for suicidal adolescents, As Safe as Possible (ASAP), supported by a smartphone app (BRITE) to                                                 | USA     | RCT         | 12–18 years<br>(M=15.1;SD= 1.5)         | 66 | 81.81 | Recruited from the psychiatric inpatient units at two academic medical centers.                                                                                                                                                                                                                                                                                 | 3 |

|    |                       |                                                                                                                                                                                                                                                                                                                                                                                            |                                                                                                                                                                                              |             |               |                                                      |     |        |                                                                                                                                                                                                               |   |
|----|-----------------------|--------------------------------------------------------------------------------------------------------------------------------------------------------------------------------------------------------------------------------------------------------------------------------------------------------------------------------------------------------------------------------------------|----------------------------------------------------------------------------------------------------------------------------------------------------------------------------------------------|-------------|---------------|------------------------------------------------------|-----|--------|---------------------------------------------------------------------------------------------------------------------------------------------------------------------------------------------------------------|---|
| 71 | Peters, 2017          | Kiss My Asthma: An Asthma Self-Management App for psychological support using self-determination theory.                                                                                                                                                                                                                                                                                   | To examine the psychological experience of asthma as reported by young people and provide examples of how an app for asthma can be designed to                                               | Australia   | Qualitative   | M=17.8                                               | 20  | 27.10  | Convenience sampling via communications sent through social media, university websites, community pharmacies, sporting clubs, high schools nurses, asthma educators, and organizations providing services for | 5 |
| 72 | Edbrooke-Childs, 2019 | Power Up is a transdiagnostic and transtherapeutic intervention to promote patient activation and shared decision-making among young people.                                                                                                                                                                                                                                               | To determine the feasibility of undertaking a cluster randomized controlled trial to test the effectiveness of a smartphone app to support patient activation and shared decision making for | UK          | Mixed-methods | CAMHS: M=14.66; SD=1.99<br>Schools: M=16.88; SD=0.68 | 142 | 45.07  | Participants were recruited through CAMHS and schools.                                                                                                                                                        | 3 |
| 73 | Traber-Walker, 2018   | Robin, a specific CBT smartphone application to support the therapy of adolescents with attenuated or full-blown psychotic symptoms. The smartphone application targets medication adherence, real-time symptom assessment and provides help coping with symptoms and stressful situations in daily life. The application is only used in combination with psychotherapy in our university | To pilot test a smartphone application to support the therapy of adolescents with attenuated or full-blown psychotic symptoms                                                                | Switzerland | Qualitative   | 14-18 years                                          | 7   | 100.00 | NR                                                                                                                                                                                                            | 4 |
| 74 | Lattie, 2017          | TECH: Teen Engaged in Collaborative Health is a peer-networked internet delivered treatment intervention. CBT-based                                                                                                                                                                                                                                                                        | To examine the feasibility and acceptability of the intervention program and                                                                                                                 | USA         | Quantitative  | 14-19 years                                          | 40  | 95.00  | Recruitment primarily took place through advertisements on social media (Instagram), as well as through schools                                                                                               | 4 |
| 75 | Ho, 2016              | TECH: Teen Engaged in Collaborative Health is a peer-networked internet delivered treatment intervention. CBT-based                                                                                                                                                                                                                                                                        | To examine whether peer-networked support promotes adherence to BITS                                                                                                                         | USA         | Mixed-methods | 15-19 years                                          | 13  | 100.00 | Adolescent participants were recruited from schools, community agencies, and word of mouth                                                                                                                    | 3 |
| 76 | Whitehouse, 2017      | TOBY (Therapy Outcomes By You) is an app-based learning curriculum designed for children and parents as a complement to                                                                                                                                                                                                                                                                    | To test the efficacy of one technology-based early intervention programme                                                                                                                    | Australia   | RCT           | M = 3.38; SD = 0.69                                  | 80  | 84.00  | NR                                                                                                                                                                                                            | 4 |

|    |                    |                                                                                                                                                                                                                                                                                                                           |                                                                                                                                                                                              |           |               |                                            |    |        |                                                                                                                                                                             |   |
|----|--------------------|---------------------------------------------------------------------------------------------------------------------------------------------------------------------------------------------------------------------------------------------------------------------------------------------------------------------------|----------------------------------------------------------------------------------------------------------------------------------------------------------------------------------------------|-----------|---------------|--------------------------------------------|----|--------|-----------------------------------------------------------------------------------------------------------------------------------------------------------------------------|---|
| 77 | Bekele, 2013       | ARIA: Adaptive Robot-Mediated Intervention Architecture involves the child sitting facing the human therapist or the robot administrator in their respective sessions and the human therapist and the robot presented the joint attention task using the hierarchical prompt protocol. A hierarchical prompt protocol was | To develop an individualized and adaptive robotic therapy platform and to conduct a usability study that investigates the potential of such a robot-mediated ASD intervention as compared to | USA       | Quantitative  | 2–5 years (M= 4.70; SD=0.7)                | 12 | 66.70  | All participants with ASD were recruited through existing clinical research programs at Vanderbilt University.                                                              | 3 |
| 78 | Kumazaki, 2018     | CommU is a 304 mm tall robot designed to promote joint attention in children with ASD.                                                                                                                                                                                                                                    | To test whether the robot is more useful in facilitating joint attention (JA) than a human agent in children with ASD during an                                                              | Japan     | RCT           | 5–6 years Intervention: M = 5.88; SD= 0.51 | 68 | 97.06  | Participants were asked to take part in the study at enrollment to the Research Center for Child Mental Development, Kanazawa University.                                   | 3 |
| 79 | Schoenfelder, 2017 | The Fitbit Flex & Facebook: collects data through its built-in accelerometer to provide proxy estimates of PA including steps, energy expended, and distance traveled. Users are asked to join a Facebook group to receive information and encouragement and digital badges are earned for                                | To evaluate feasibility and acceptability of an innovative intervention incorporating an mHealth-linked wearable activity tracker (Fitbit Flex) and a Facebook group to increase             | USA       | Mixed-methods | 14–18 years (M=15.5;SD = 1.4)              | 11 | 100.00 | Recruited using flyers through primary care and specialty clinics affiliated with a children's hospital.                                                                    | 5 |
| 80 | Zhang, 2018        | CVE: Collaborative Virtual Environment where 2 geographically distributed users can interact and communicate with each other in a shared environment. Several puzzle games promoting collaborative-communication and collaborative-                                                                                       | To examine the feasibility and performance characteristics of a CVE and an associated strategy for quantifying aspects of social communication and                                           | USA       | Quantitative  | 10.59-13.89 years                          | 28 | 100.00 | Participants recruited through an electronic recruitment registry accessible to community families. ASD participants recruited from an existing clinical research registry. | 3 |
| 81 | Yuan, 2018         | CAVE: Immersive VRE in a four-side Cave Automatic Virtual Environment (CAVE). Participants enter the CAVE individually and navigate the VRE with guidance and support. Six learning scenarios designed for relaxation, four training scenarios and one                                                                    | To examine the efficacy of a VR-enabled training program on emotional and social skills                                                                                                      | Hong Kong | Mixed-methods | M=8.86; SD=1.13                            | 72 | 74.00  | Primary school children diagnosed with ASD from mainstream primary schools were recruited.                                                                                  | 3 |
| 82 | Cai, 2013          | VDI (virtual dolphin interaction): Virtual Reality - Dolphin-assisted CBT therapy for autism intervention and treatment                                                                                                                                                                                                   | To present an innovative design and development of a Virtual Dolphinarium for                                                                                                                | Singapore | Quantitative  | 6-17 years                                 | 15 | NK     | A random selection of 15 participants from a cohort of 32 children with autism who had taken part in the dolphin-                                                           | 4 |
